# Supplementary material
Source: PubMed Central journal article supplement (PMC3592020)
Supplement: MCB.01713-12_zmb999109885so1.pdf [file MCB.01713-12_zmb999109885so1.pdf]

### Fusion junction in homology region 3

CGTTAGCGAGTCTGTTGTAATAGACGAGTAGTAAATTAAGAATT  
CAATCAAGTCACATTAGGAAAATAAAATTTAAATAAATTTCAAGT  
TAGTCAGTCGTATAGTAGATGAATGAATGGGGGTAAAATCTCGC  
TATTTGTTTGTATTGTGGAATAATGAAGAGTCATGGGAGATGA  
ATGTTGTAAACGATGGCATAGAATTGGTAACGAAAAGTGAAATC  
ATTGGGATCAACTATTTTCAGTATTTTGTTTAAAGAAAATGTTGAA  
CTCGACAAGTAATGAGAGGTGGTGCTTTCGTTAAATAATGAGTG  
GTGGTTACGGTTATACAGGATATGATCTGTGTATGGTGAGAATGT  
GATGTATGTATTTGAGTATAGACAATCAGAAAATCTGTAAATAAT  
CAAGTCGCAAGAAAAAATGAAAATAGATATACAAAGTAAAGAG  
ATGAATGAAATGACAAGGTATCGTAATGAAAATTGAAATTGTTG  
AAGACGAATAGATGAGTAAATGAGTAAGTGAGTAGAGTAGATG  
AGTAGATGAGTAGATGAGTAAATAAGTAAATGAGTAAATAAGTA  
AATGAGTAAATGAGTAAAGAGAGTAATCGTTTGAATAGGACGA  
CGATGCTCACTATTGATGATGGGTTGGTTACAGTTACATGGTTGC  
ATTGGATATGTGTAAGGTGATAATGACGATGATTAATAAGAAATG  
GAATAAAGTGTCGCTATTGAATGAAAATGAAAATGAAAATAATG  
AGTCAGTCATATTACAAGTAAGACGGTAGATAATAAAGAATAGTT  
ATGTAAGTTGGTATTGTGAAAGATGATGATAGAAAATAATAATTG  
ATGAACAGATGAGATAAATAAGATGAAGATTTTCGTTTGAATGAA  
AAGTAACGGTTCTATAACATATGNAATGAGGTGAATGGTAGTAA  
GATAGATAGAATAGAGTAAGATAGATAGAATAGAGTAAGATCGA  
TAGAATAAAGTATGGGNGATATAAATA

## Fusion junction in homology region 5

TTTTCCCATCGATGTCTAAGAAGGATCTGACAAAGTTGTTTGGTGGAGTAAGTGATCA  
GCAAAGAAATGAGTGCGACAACCTATAGCAACCACTACAACGACAACCTCTAATGATAAT  
GACAATGATGTGTTTCTCAAATTACATTGGTCTAAATCTGCTATTA AAAAGTATGAGAC  
AAAGGCATCTATCTTCAATGAGTTATTGTTTTGTCTAGTGTACATATATCTGCTGGACAA  
CCAGCCAGAGTGCAAGAGATGGTGTATTGGACTTTGCGGAATGGCAAGTATAAGACT  
CGCGAATTGTATTTGATGTTTGGGAAGGCTGATGATTACAGCAGATACGATAAGACTC  
GTAATATGAAGTTTGCTGAAAAGCCAATCCCCAGGTTTCTTTCTGAGCCGCTTTCCATT  
TTAGCACTTCGGTACTATGTTTTGGTTCGACCATTAGAAGCATTGATGAAGTATGTGAC  
AACCGCTGATAGGTCGAAAGTAGCTGCATGCACACTTGGATTTTCATGTTTGTGATTGT  
TGGCGAACGATTGCAAAGAGATTTACCGTATCGAATTTTTTCAAAGGCCATCTACCAA  
TGCATTCAGAAACCGTTGGGATTTCAA AACTACAGACACATTGCTCACTACTTTAAAG  
AAAAGAACATCGAGAAAGACATGACGAGAGAATCTTATTTTCGATTTACAGGGTGAA  
CATACACGAAACACAGCGCTCTACATCTATGGACGCACTATGGACA ACTTGCATTATCT  
GCCATCGGATTATTTTGTCAACTTTTTTCGTGCAAGCTATAAGTGGCAGGAACTATTGC  
AGATTGAGACAACCCGACCCATGGATTGTTGGTAGAAACAAAGCACCCATTCATCA  
AGCGAGTTGATCAATTGGAGAACGCAAATGGAAAGACACGAATCATGATCGCTTAGC  
AAGG
